# Supplementary material for: A copper catalyzed multicomponent cascade redox reaction for the synthesis of quinazolinones
Source: Royal Society of Chemistry journal article supplement (doi:10.1039/c6ra10997g), 2016-01-01

## **Supporting Information**

### **Copper Catalyzed Multicomponent Cascade Reaction for Synthesis of Quinazalinones**

Mahesh H. Shinde, and Umesh A. Kshirsagar\*

Department of Chemistry, Savitribai Phule Pune University (Formerly: University of Pune), Ganeshkhind,  
Pune- 411007, Maharashtra, INDIA.

*uakshirsagar@chem.unipune.ac.in*

### **Table of contents**

|                                                                               |                                 |
|-------------------------------------------------------------------------------|---------------------------------|
| General                                                                       | S <sub>1</sub>                  |
| General procedure                                                             | S <sub>2</sub>                  |
| Spectral and analytical data of all the compounds                             | S <sub>3</sub> -S <sub>6</sub>  |
| Copies of <sup>1</sup> H and <sup>13</sup> C NMR spectra of all the compounds | S <sub>7</sub> -S <sub>19</sub> |

### **General**

All chemicals were of reagent grade quality, purchased commercially from TCI-Chemicals, Sigma-Aldrich, or Spectrochem, and used without further purification. Column chromatography was performed on Merck chromatographic silica gel (100-200 mesh). TLC analyses were performed using Merck silica gel 60 F<sub>254</sub> precoated aluminium plates. NMR spectra were recorded on Bruker Avance III (500MHz), or Varian Mercury (300 MHz) instruments; chemical shifts, given in ppm, are relative to Me<sub>4</sub>Si as the internal standard or to the residual solvent peak. HR-MS data were obtained using a Thermo-Scientific Bruker Daltonik GmbH, Germany Impact II UHR-ToF Mass Spectrometer ESI (Electron Spray Ionization).

**General procedure for the synthesis of Quinazalinone (3):**

Oven dried sealed tube with spin bar was charged with 2-bromobenzamide (0.5 mmol), benzyl alcohol (1.0 mmol), sodium azide (1.0 mmol), copper (II) oxide (0.20 mmol), L-proline (0.20 mmol), TEMPO (0.10 mmol), *p*-toluene sulfonic acid (0.20mmol) in 2 mL DMF. Reaction mixture was heated to 110° C for 24 h. Reaction progress was checked using TLC. After completion of reaction it was cooled to room temperature. Crude product was extracted with ethyl acetate (3 x 20 mL). The combined organic layer was dried over anhydrous Na<sub>2</sub>SO<sub>4</sub> and concentrated in vacuo. The crude product was purified by silica gel column chromatography with hexane–ethyl acetate to give quinazalinone (3).

## Spectral and Analytical data:

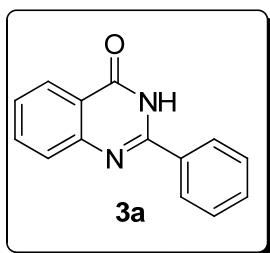

**2-Phenylquinazolin-4(3H)-one (3a):** white solid,  $R_f = 0.5$  (ethyl acetate:hexane, 4:6);  $^1\text{H}$  NMR (500 MHz,  $\text{CDCl}_3$ ):  $\delta$  7.51-7.56 (m, 1H), 7.60-7.63 (m, 3H), 7.81-7.88 (m, 2H), 8.29 (dd,  $J = 2.75, 6.25$  Hz, 2H), 8.36 (dd,  $J = 1.07, 8.09$  Hz, 1H), 11.67 (br.s, 1H);  $^{13}\text{C}$  NMR (125 MHz,  $\text{CDCl}_3$ ):  $\delta$  120.9, 126.4, 126.9, 127.9, 128.0, 129.0, 131.6, 132.8, 134.9, 149.5, 151.7, 163.8; HRMS (ESI,  $m/z$ ) calcd for  $\text{C}_{14}\text{H}_{11}\text{N}_2\text{O} = 223.0871$   $[\text{M} + \text{H}]^+$ , found 223.0869.

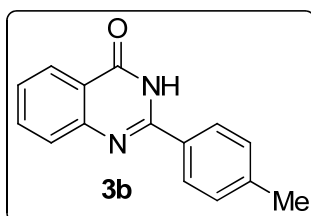

**2-(p-Tolyl)quinazolin-4(3H)-one (3b):** white solid,  $R_f = 0.6$  (ethyl acetate:hexane, 4:6);  $^1\text{H}$  NMR (500 MHz,  $\text{CDCl}_3$ ):  $\delta$  2.48 (s, 3H), 7.40 (d,  $J = 7.48$  Hz, 2H), 7.52 (t,  $J = 7.02$  Hz, 1H), 7.4 (t,  $J = 8.27$  Hz, 2H), 8.16 (d,  $J = 7.17$  Hz, 2H), 8.35 (d,  $J = 7.93$  Hz, 1H), 11.55 (brs, 1H);  $^{13}\text{C}$  NMR (125 MHz,  $\text{CDCl}_3$ ):  $\delta$  21.5, 120.8, 126.3, 126.5, 127.3, 127.9, 129.7, 129.9, 134.8, 142.2, 149.6, 151.8, 163.8; HRMS (ESI,  $m/z$ ) calcd for  $\text{C}_{15}\text{H}_{13}\text{N}_2\text{O} = 237.1028$   $[\text{M} + \text{H}]^+$ , found 237.1024.

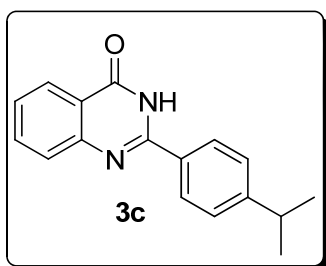

**2-(4-Isopropylphenyl)quinazolin-4(3H)-one (3c):** white solid,  $R_f = 0.6$  (ethyl acetate:hexane, 4:6);  $^1\text{H}$  NMR (500 MHz,  $\text{CDCl}_3$ ):  $\delta$  1.35 (d,  $J = 7.02$  Hz, 6H), 3.05 (sept,  $J = 7.02$  Hz, 1H), 7.46 (d,  $J = 8.24$  Hz, 2H), 7.51-7.55 (m, 1H), 7.80-7.86 (m, 2H), 8.23 (d,  $J = 8.24$  Hz, 2H), 8.35-8.37 (m, 1H), 11.76 (brs, 1H);  $^{13}\text{C}$  NMR (125 MHz,  $\text{CDCl}_3$ ):  $\delta$  23.8, 34.2, 120.8, 126.3, 126.5, 127.1, 127.5, 127.9, 130.3, 134.8, 149.6, 151.8, 151.9, 164.0; HRMS (ESI,  $m/z$ ) calcd for  $\text{C}_{17}\text{H}_{17}\text{N}_2\text{O} = 265.1341$   $[\text{M} + \text{H}]^+$ , found 265.1333.

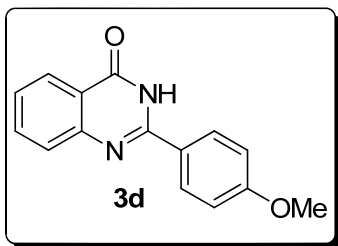

**2-(4-Methoxyphenyl)quinazolin-4(3H)-one (3d):** white solid,  $R_f = 0.3$  (ethyl acetate:hexane, 4:6);  $^1\text{H}$  NMR (500 MHz,  $\text{CDCl}_3$ ):  $\delta$  3.94 (s, 3H), 7.10 (d,  $J = 8.55$  Hz, 2H), 7.48-7.53 (m, 1H), 7.79-7.83 (m, 2H), 8.22 (d,  $J = 8.54$  Hz, 2H), 8.34 (d,  $J = 7.93$  Hz, 1H), 11.24 (br.s, 1H);  $^{13}\text{C}$  NMR (125 MHz,  $\text{CDCl}_3$ ):  $\delta$  55.5, 114.4, 120.6, 125.0, 126.4, 126.5, 127.8, 129.0, 134.8, 149.7, 151.3, 162.5, 163.7.

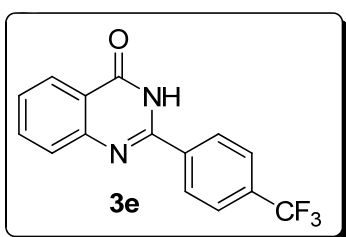

**2-(4-(Trifluoromethyl)phenyl)quinazolin-4(3H)-one (3e):** white solid,  $R_f = 0.3$  (ethyl acetate:hexane, 4:6);  $^1\text{H}$  NMR (500 MHz,  $\text{CDCl}_3$ ):  $\delta$  7.53-7.56 (m, 1H), 7.69-7.77 (m, 3H), 7.80-7.88 (m, 3H), 8.22 (d,  $J = 7.93$  Hz, 1H), 10.88 (br.s, 1H);  $^{13}\text{C}$  NMR (125 MHz,  $\text{CDCl}_3$ ):  $\delta$  123.5 (q,  $J_{\text{C-F}} = 224.34$  Hz), 126.9 (q,  $J_{\text{C-F}} = 4.54$  Hz), 127.4, 128.0, 130.6, 130.5, 130.6 (q,  $J_{\text{C-F}} = 31.79$  Hz), 132.2, 135.0, 148.7, 151.3, 162.5; HRMS (ESI,  $m/z$ ) calcd for  $\text{C}_{15}\text{H}_{10}\text{F}_3\text{N}_2\text{O} = 291.0745$  [ $\text{M} + \text{H}$ ] $^+$ , found 291.0736.

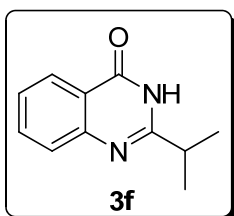

**2-Isopropylquinazolin-4(3H)-one (3f):** white solid,  $R_f = 0.3$  (ethyl acetate:hexane, 4:6);  $^1\text{H}$  NMR (500 MHz,  $\text{DMSO-}d_6$ ):  $\delta$  1.27 (d,  $J = 6.71$  Hz, 6H), 2.89 (sept,  $J = 6.71$  Hz, 1H), 7.46 (t,  $J = 7.63$ , 1H), 7.62 (d,  $J = 7.93$  Hz, 1H), 7.78 (t,  $J = 7.93$  Hz, 1H), 8.09 (d,  $J = 7.93$  Hz, 1H), 12.14 (br.s, 1H);  $^{13}\text{C}$  NMR (125 MHz,  $\text{DMSO-}d_6$ ):  $\delta$  20.4, 33.3, 120.9, 125.7, 126.0, 127.0, 134.2, 148.9, 151.3, 161.6, 162.0.

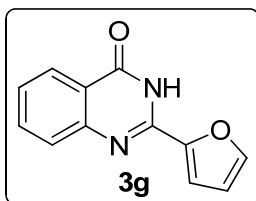

**2-(Furan-2-yl)quinazolin-4(3H)-one (3g):** white solid,  $R_f = 0.3$  (ethyl acetate:hexane, 4:6);  $^1\text{H}$  NMR (500 MHz,  $\text{CDCl}_3$ ):  $\delta$  6.69 (d,  $J = 1.53$  Hz, 1H), 7.50 (t,  $J = 7.63$ , 1H), 7.66-7.70 (m, 2H), 7.78-7.83(m, 2H), 8.34 (d,  $J = 7.63$  Hz, 1H), 11.47 (br.s, 1H);  $^{13}\text{C}$  NMR (125 MHz,  $\text{CDCl}_3$ ):  $\delta$  112.8, 114.1, 120.9, 126.4, 126.7, 127.7, 135.0, 143.6, 145.6, 146.3, 149.3, 162.9, 162.0; HRMS (ESI,  $m/z$ ) calcd for  $\text{C}_{12}\text{H}_9\text{N}_2\text{O} = 213.064$   $[\text{M} + \text{H}]^+$ , found 213.0658.

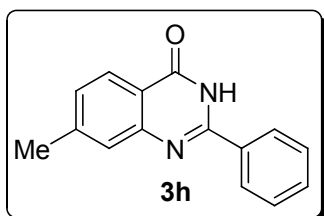

**7-Methyl-2-phenylquinazolin-4(3H)-one (3h):** white solid,  $R_f = 0.3$  (ethyl acetate:hexane, 4:6);  $^1\text{H}$  NMR (500 MHz,  $\text{CDCl}_3$ ):  $\delta$  2.55 (s, 3H), 7.33 (dd,  $J = 0.92, 7.02$  Hz, 1H), 7.58-7.60 (m, 3H), 7.65 (br.m, 1H), 8.22 (d,  $J = 7.93$  Hz, 1H), 8.25-8.26 (m, 2H), 11.06 (br.s, 1H);  $^{13}\text{C}$  NMR (125 MHz,  $\text{DMSO-}d_6$ ):  $\delta$  21.4, 118.6, 125.7, 127.1, 127.7, 128.0, 128.6, 131.3, 132.8, 145.1, 148.9, 152.3, 162.1.

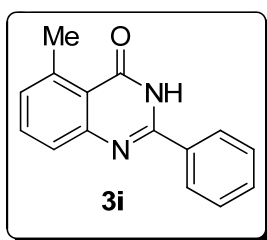

**5-Methyl-2-phenylquinazolin-4(3H)-one (3i):** white solid,  $R_f = 0.3$  (ethyl acetate:hexane, 4:6);  $^1\text{H}$  NMR (400 MHz,  $\text{CDCl}_3$ ):  $\delta$  2.88 (s, 3H), 7.17-7.19 (m, 3H), 7.47-7.50 (m, 2H), 7.56-7.60 (m, 1H), 8.16 (dd,  $J = 1.59, 5.75$  Hz, 2H), 10.93 (br.s, 1H);  $^{13}\text{C}$  NMR (125 MHz,  $\text{DMSO-}d_6$ ):  $\delta$  22.5, 119.3, 125.7, 127.7, 128.6, 128.9, 131.3, 132.5, 133.6, 140.0, 150.3, 152.0, 163.0.

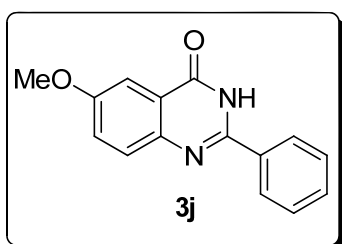

**6-Methoxy-2-phenylquinazolin-4(3H)-one (3j):** white solid,  $R_f = 0.3$  (ethyl acetate:hexane, 4:6);  $^1\text{H}$  NMR (500 MHz,  $\text{CDCl}_3$ ):  $\delta$  3.97 (s, 3H), 7.28 (s, 1H), 7.43 (dd,  $J = 2.90, 5.95$  Hz, 1H), 7.56-7.60 (m, 3H), 7.71(d,  $J = 2.75$  Hz, 1H), 7.79 (d,  $J = 8.85$  Hz, 1H), 8.10-8.12 (m, 1H), 10.31 (br.s, 1H);  $^{13}\text{C}$  NMR (125 MHz,  $\text{CDCl}_3$ ):  $\delta$  55.8, 105.9, 121.7, 125.2, 126.7, 129.2, 129.7, 131.4, 132.9, 144.0, 149.2, 158.5, 161.2; HRMS (ESI,  $m/z$ ) calcd for  $\text{C}_{15}\text{H}_{13}\text{N}_2\text{O} = 253.0977$   $[\text{M} + \text{H}]^+$ , found 253.0974.

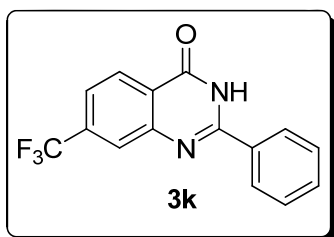

**2-Phenyl-7-(trifluoromethyl)quinazolin-4(3H)-one (3k):** white solid,  $R_f = 0.4$  (ethyl acetate:hexane, 4:6);  $^1\text{H NMR}$  (500 MHz,  $\text{DMSO-}D_6$ ):  $\delta$  7.56-7.65 (m, 3H), 7.82 (dd,  $J = 1.37, 8.24$  Hz, 1H), 8.06 (s, 1H), 8.20-8.22 (m, 2H), 8.35 (d,  $J = 8.24$  Hz, 1H), 12.84 (br.s, 1H).

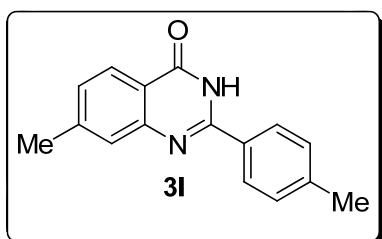

**7-Methyl-2-p-tolylquinazolin-4(3H)-one(3l):** white solid,  $R_f = 0.5$  (ethyl acetate:hexane, 4:6);  $^1\text{H NMR}$  (500 MHz,  $\text{DMSO-}D_6$ ):  $\delta$  2.39 (s, 3H), 2.47 (s, 3H), 7.32-7.36 (m, 3H), 7.54 (s, 1H), 8.03 (d,  $J = 8.09$  Hz, 1H), 8.09 (d,  $J = 8.09$  Hz, 2H), 12.38 (br.s, 1H);  $^{13}\text{C NMR}$  (125 MHz,  $\text{DMSO-}D_6$ ):  $\delta$  21.0, 21.4, 118.5, 125.7, 127.1, 127.6, 127.9, 129.2, 130.0, 141.4, 145.0, 149.0, 152.2, 162.1.

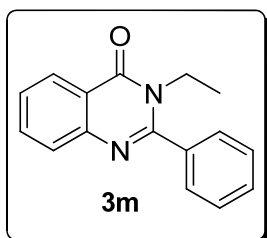

**3-Ethyl-2-phenylquinazolin-4(3H)-one (3m):** white solid,  $R_f = 0.3$  (ethyl acetate:hexane, 4:6);  $^1\text{H NMR}$  (500 MHz,  $\text{CDCl}_3$ ):  $\delta$  1.24 (t,  $J = 7.02$  Hz, 3H), 4.07 (q,  $J = 7.02$  Hz, 2H), 7.51-7.53 (m, 1H), 7.54-7.58 (m, 5H), 7.75-7.80 (m, 2H), 8.36 (dd,  $J = 1.22, 6.71$  Hz, 1H);  $^{13}\text{C NMR}$  (125 MHz,  $\text{CDCl}_3$ ):  $\delta$  14.1, 41.2, 120.9, 126.7, 126.9, 127.4, 127.6, 128.8, 129.8, 134.3, 135.6, 147.2, 156.2, 162.0

## Copies of $^1\text{H}$ and $^{13}\text{C}$ NMR spectra:

$^1\text{H}$  NMR spectrum for compound **3a** ( $\text{CDCl}_3$ , 500 MHz)

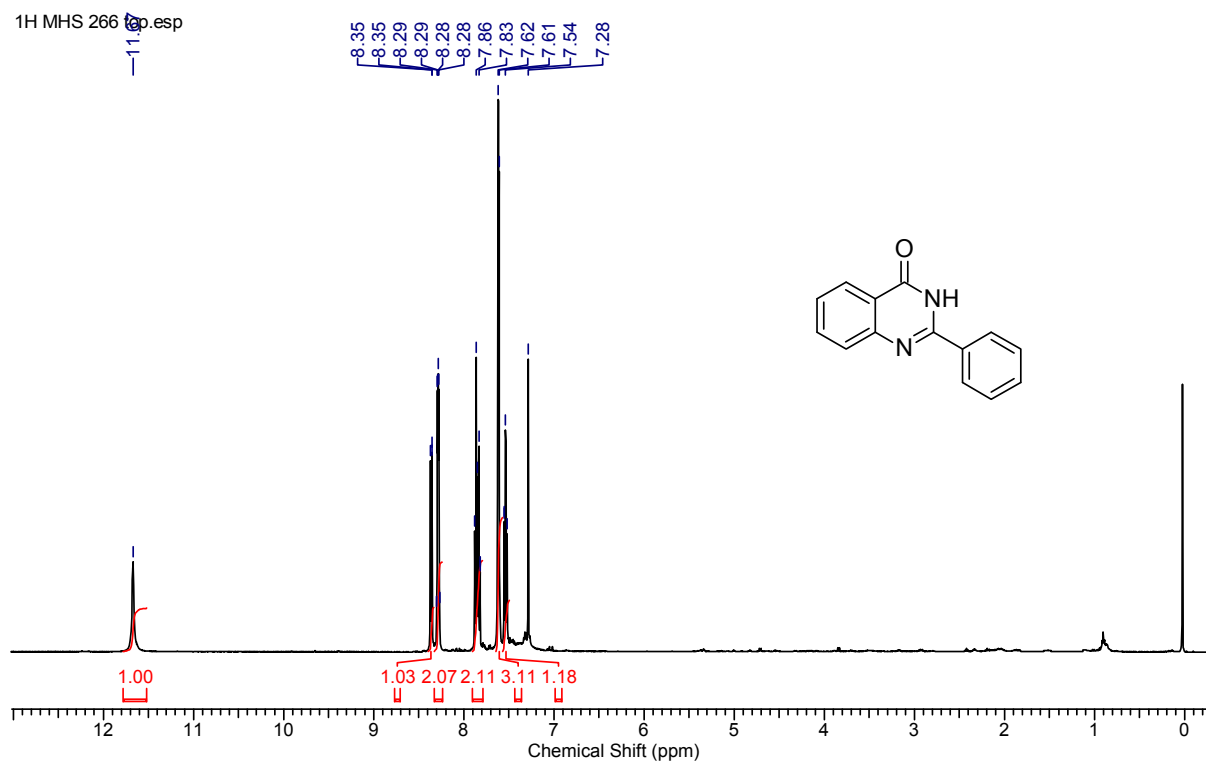

$^{13}\text{C}$  NMR spectrum for compound **3a** ( $\text{CDCl}_3$ , 125 MHz)

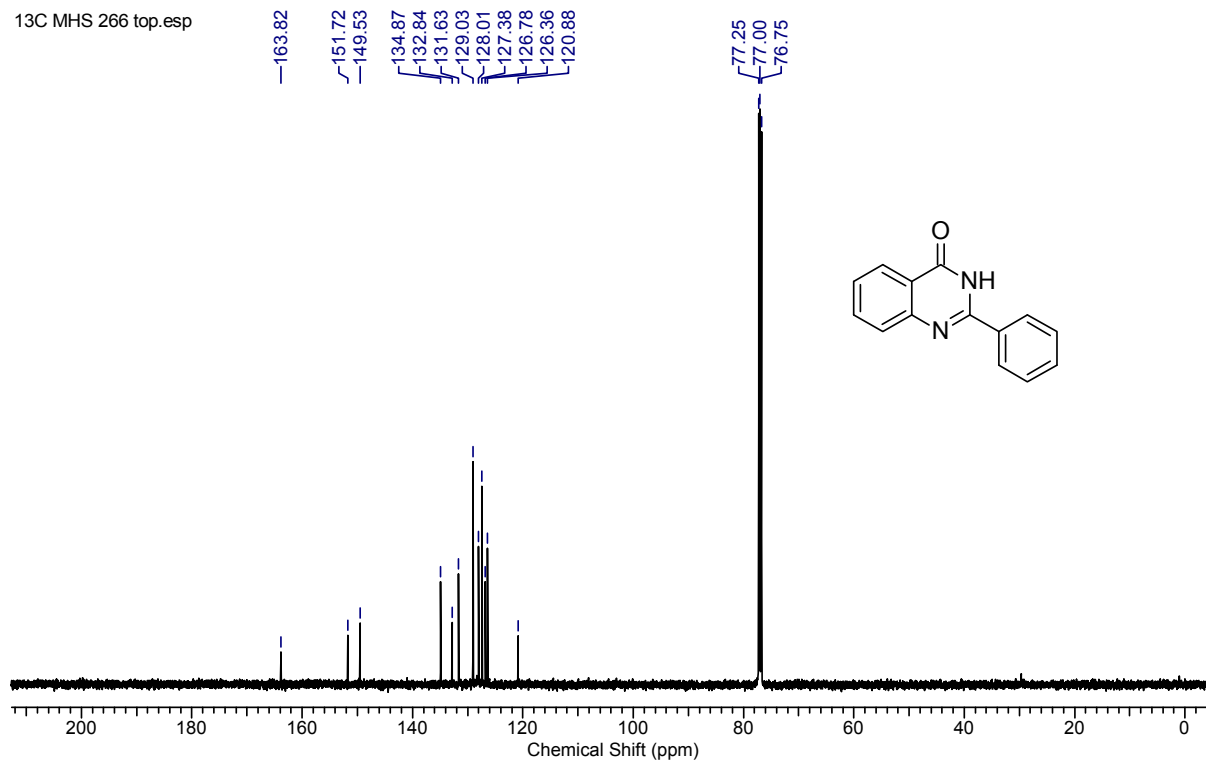

<sup>1</sup>H NMR spectrum for compound **3b** (CDCl<sub>3</sub>, 500 MHz)

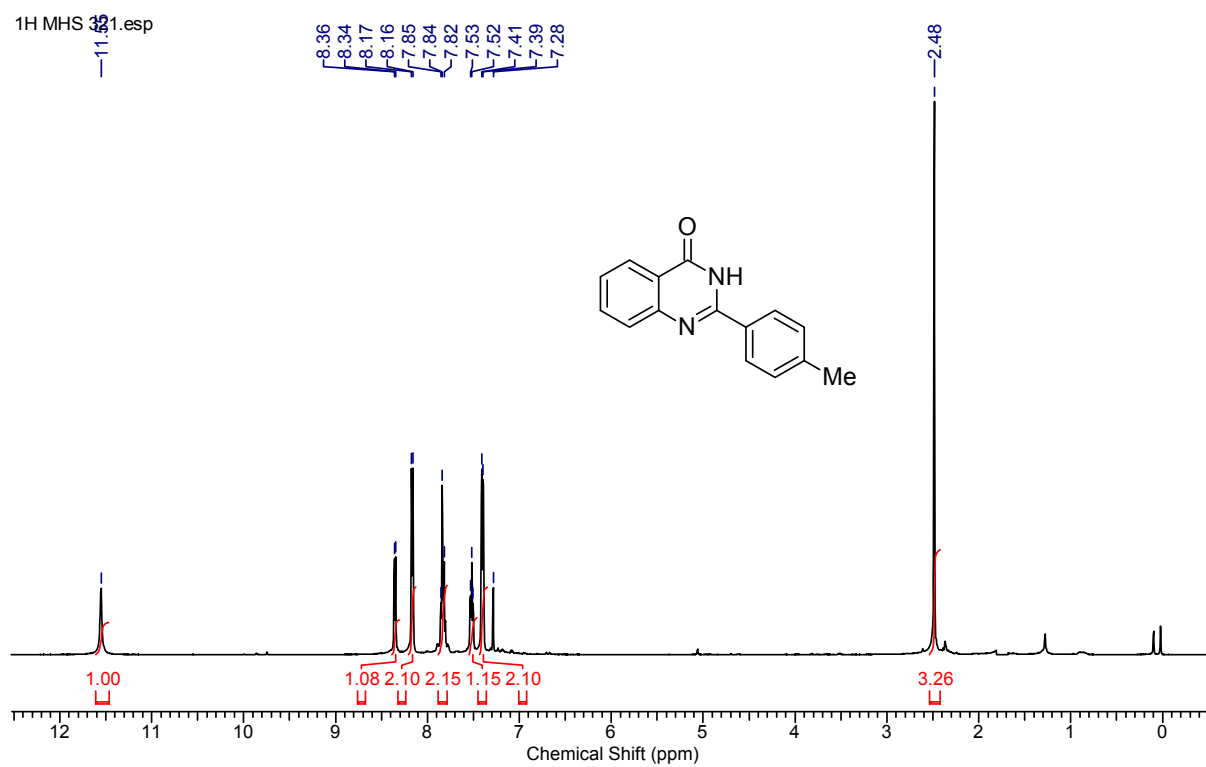

<sup>13</sup>C NMR spectrum for compound **3b** (CDCl<sub>3</sub>, 125 MHz)

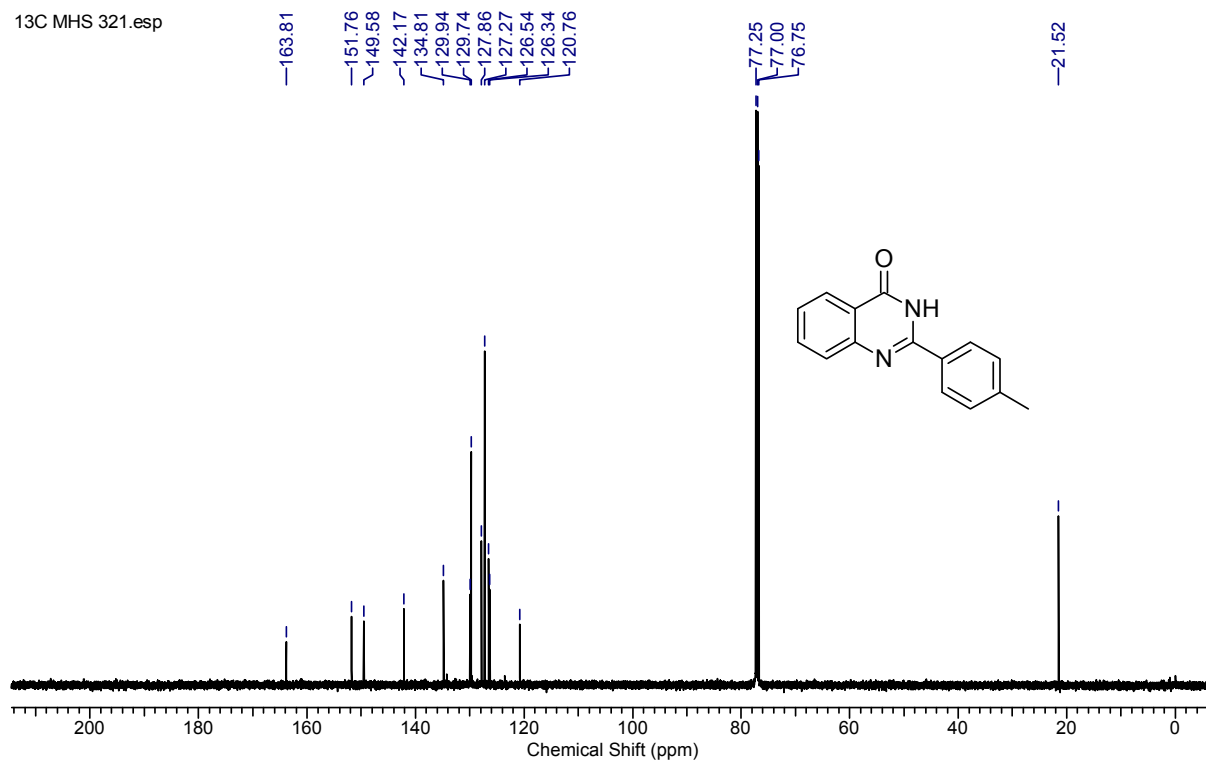



<sup>1</sup>H NMR spectrum for compound **3c** (CDCl<sub>3</sub>, 500 MHz)

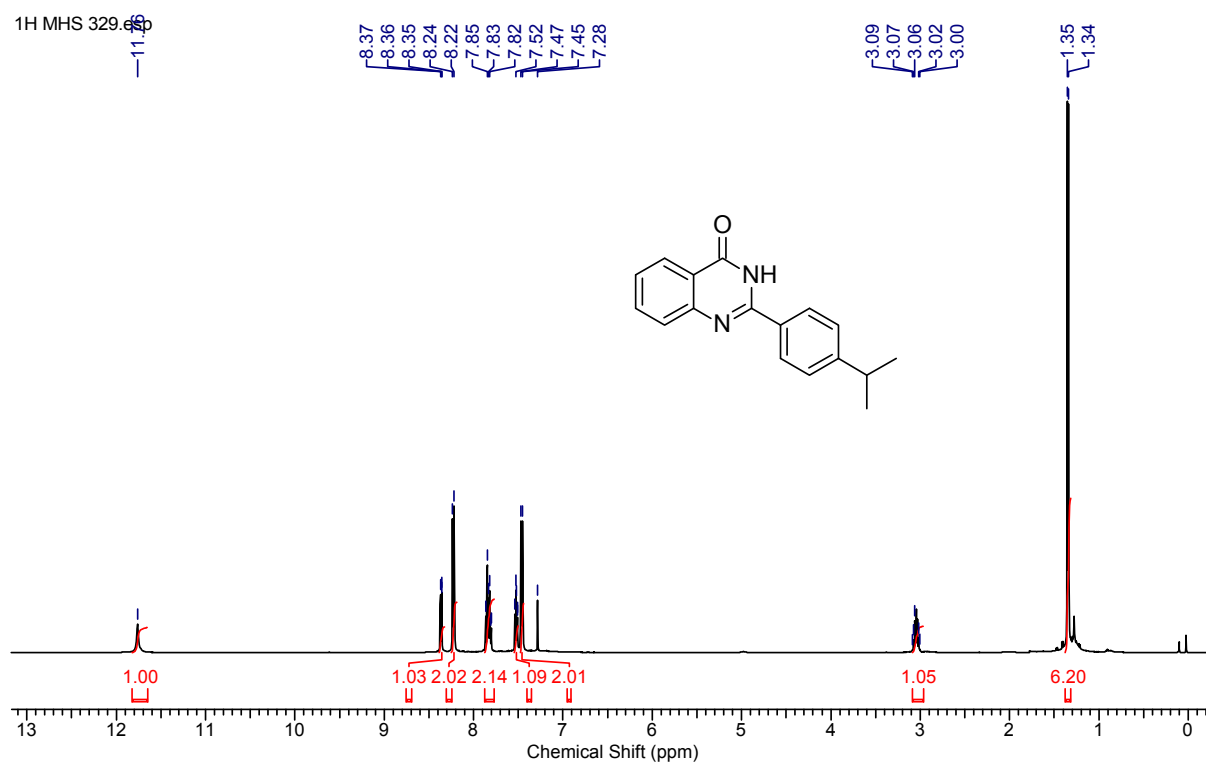

<sup>13</sup>C NMR spectrum for compound **3c** (CDCl<sub>3</sub>, 125 MHz)

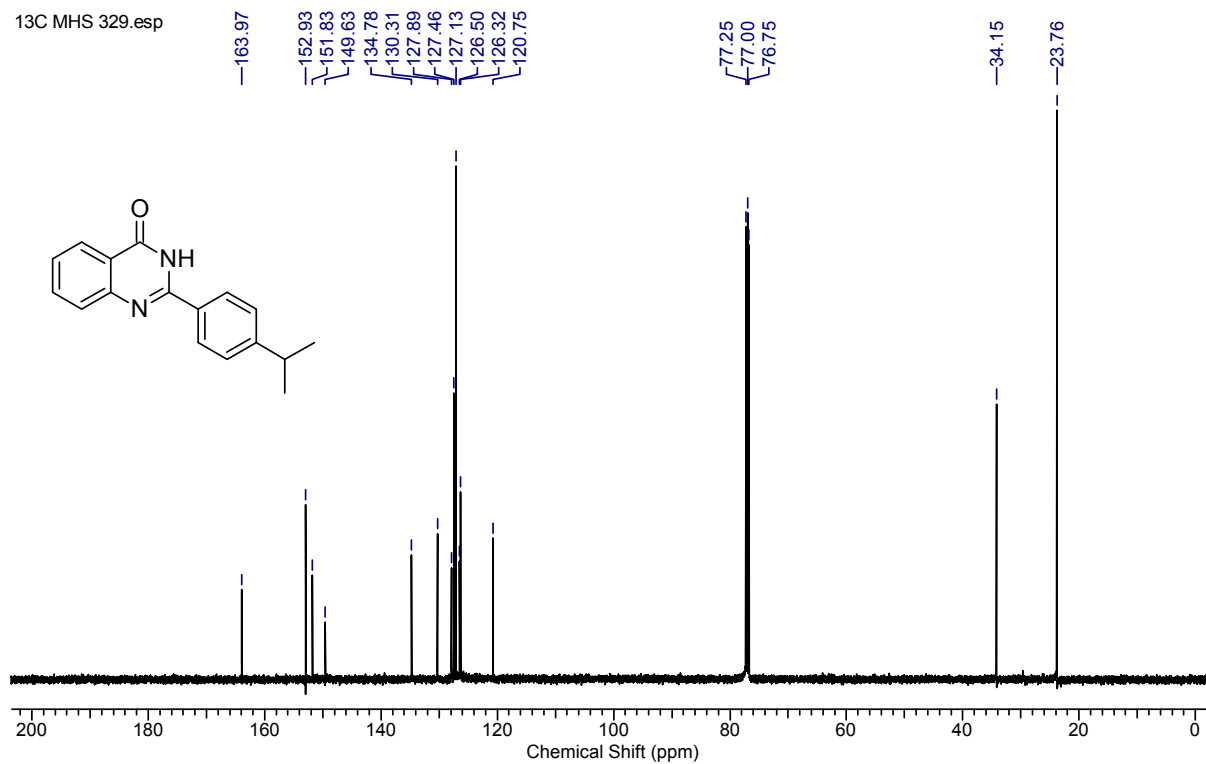

<sup>1</sup>H NMR spectrum for compound **3d** (CDCl<sub>3</sub>, 500 MHz)

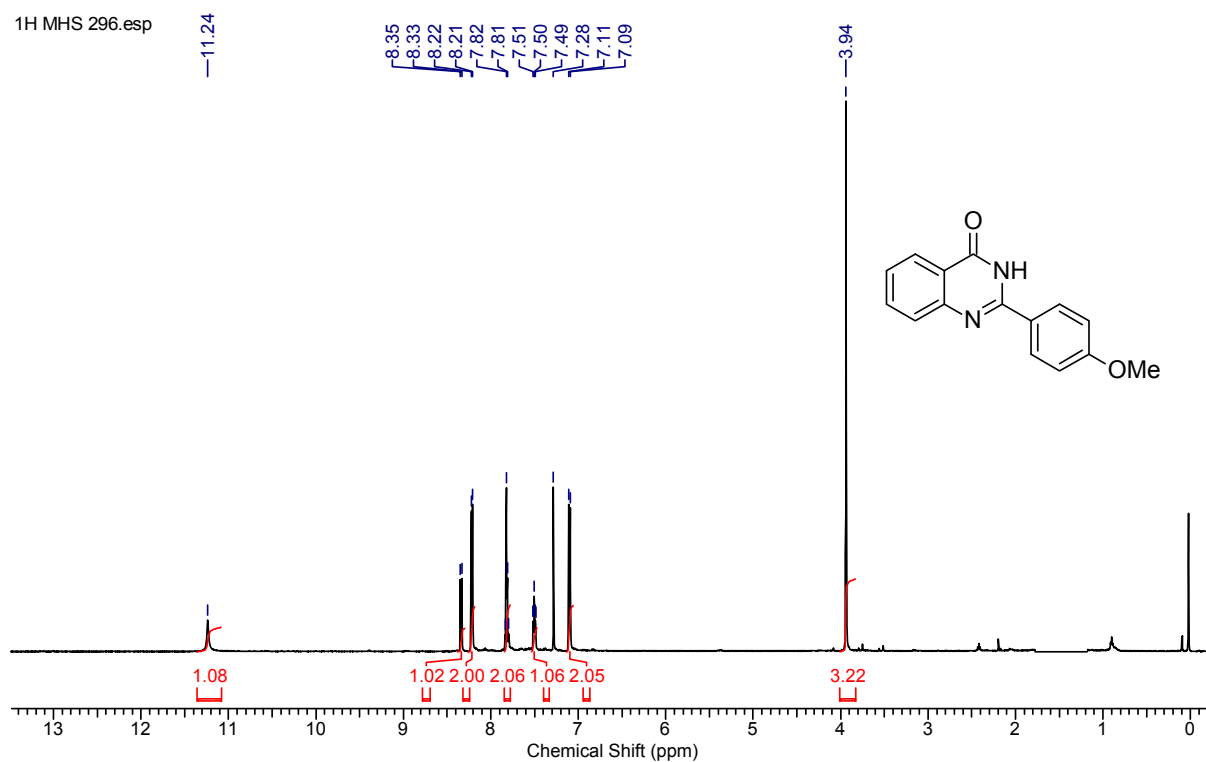

<sup>13</sup>C NMR spectrum for compound **3d** (CDCl<sub>3</sub>, 125 MHz)

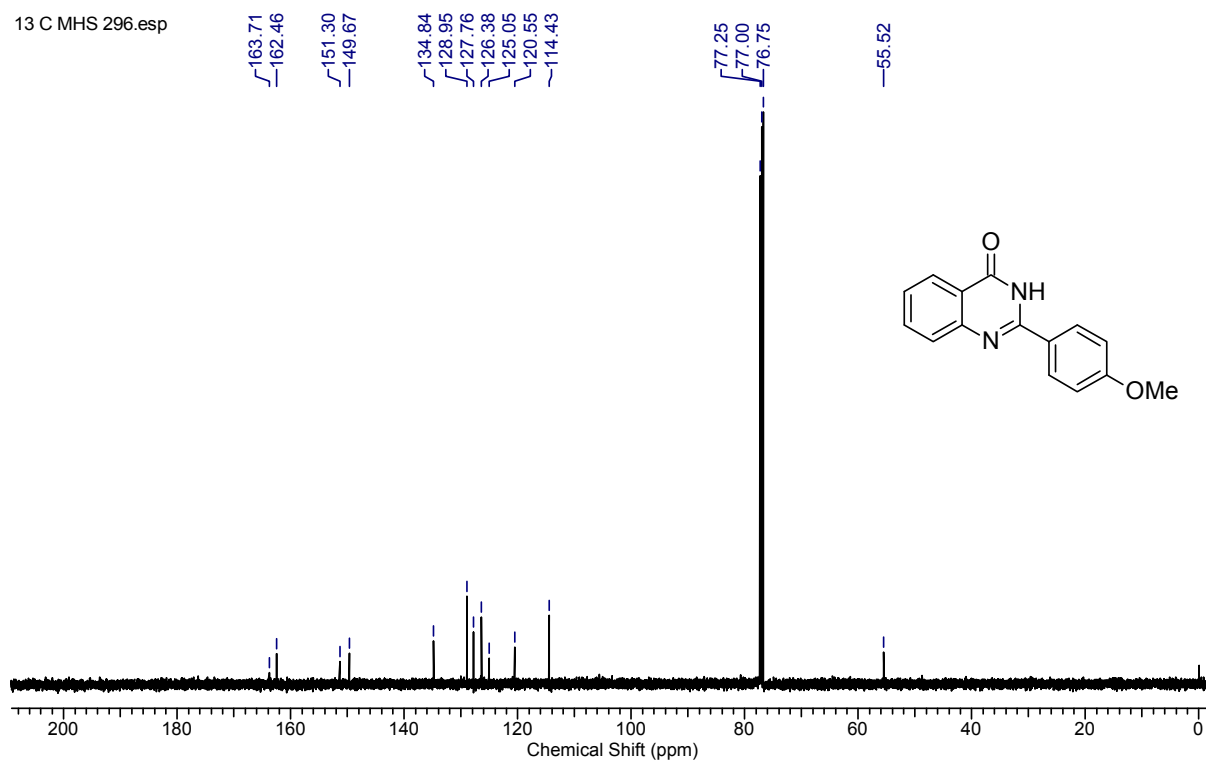

<sup>1</sup>H NMR spectrum for compound **3e** (CDCl<sub>3</sub>, 500 MHz)

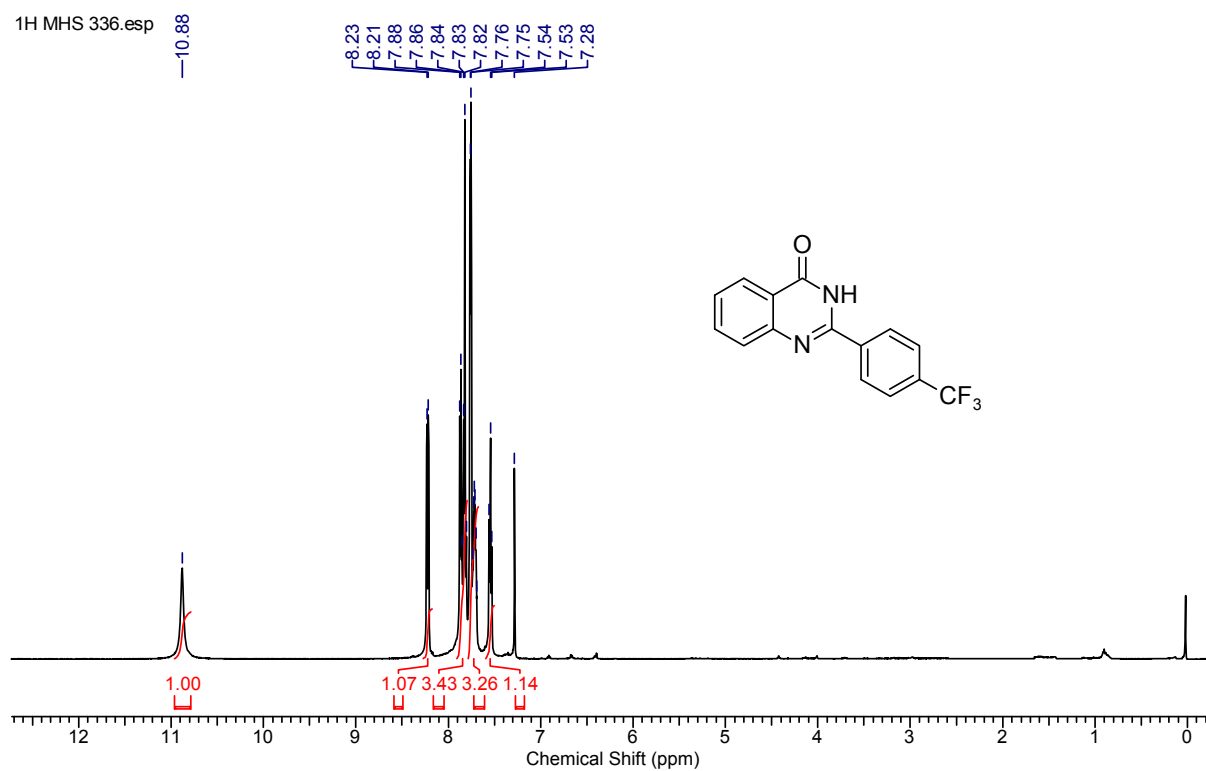

<sup>13</sup>C NMR spectrum for compound **3e** (CDCl<sub>3</sub>, 125 MHz)

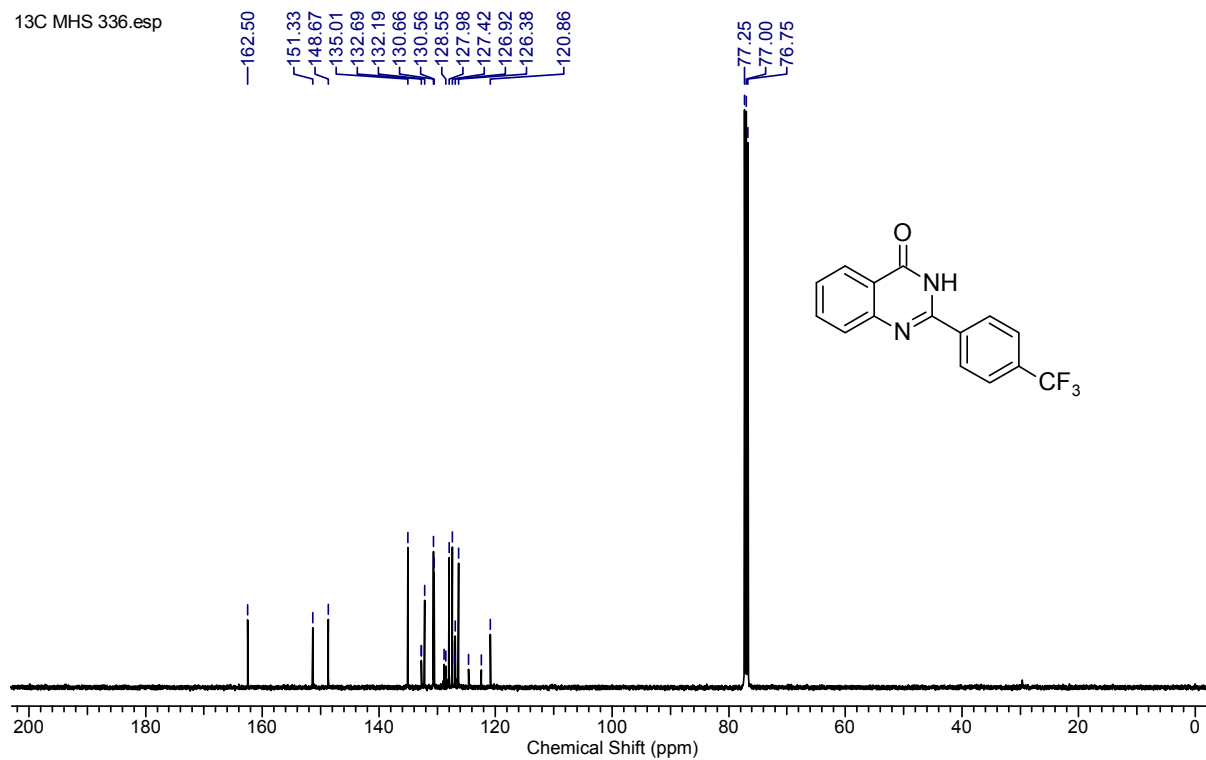

<sup>1</sup>H NMR spectrum for compound **3f** (DMSO-D<sub>6</sub>, 500 MHz)

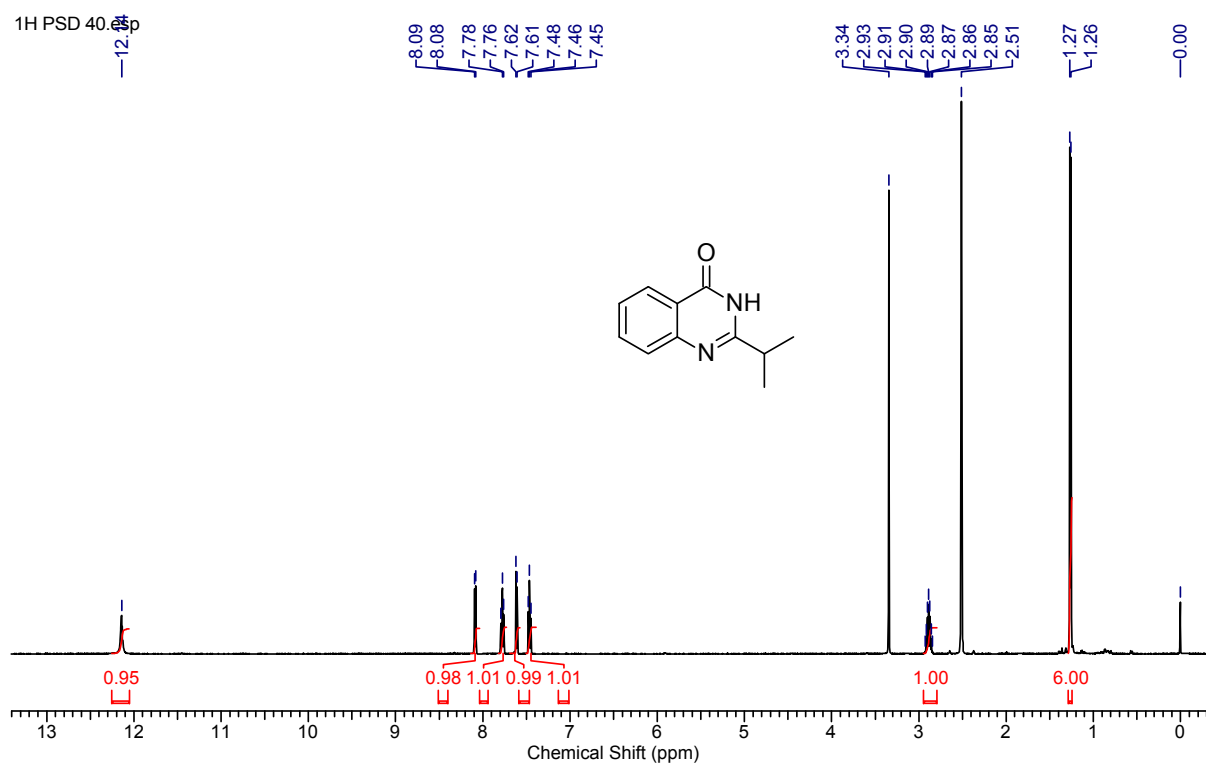

<sup>13</sup>C NMR spectrum for compound **3f** (DMSO-D<sub>6</sub>, 125 MHz)

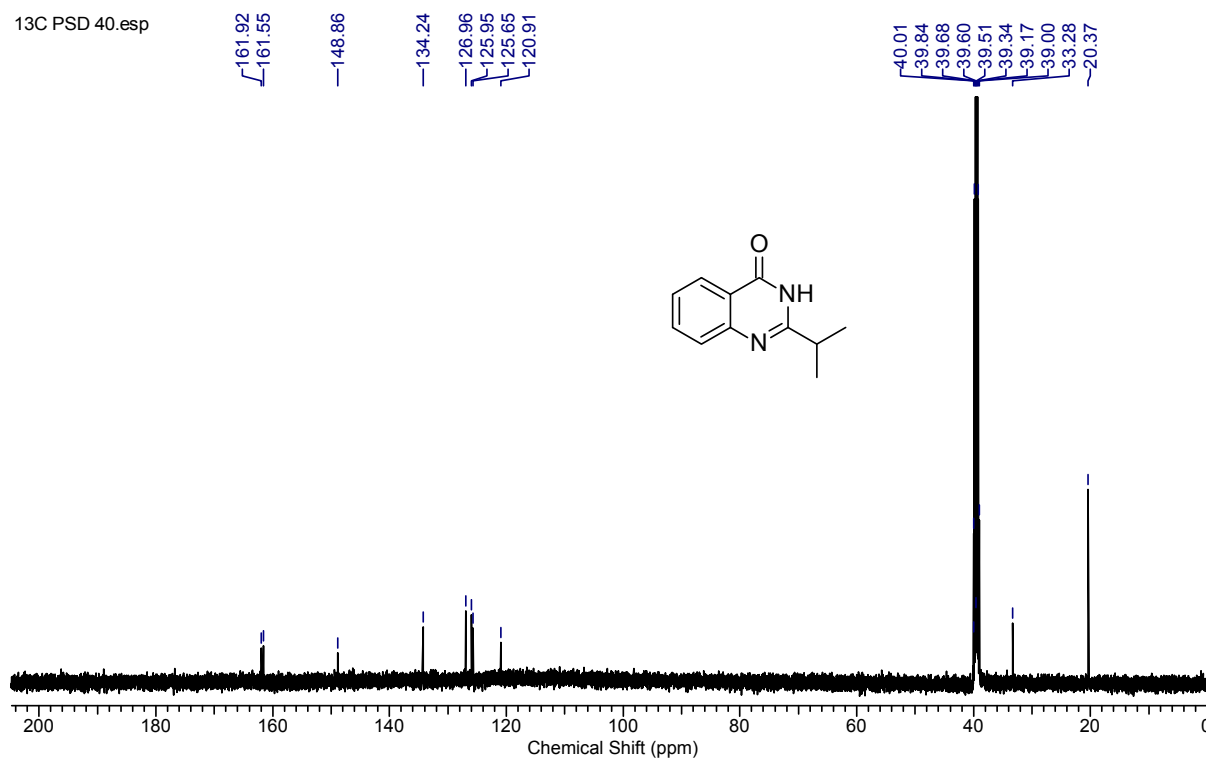

<sup>1</sup>H NMR spectrum for compound **3g** (CDCl<sub>3</sub>, 500 MHz)

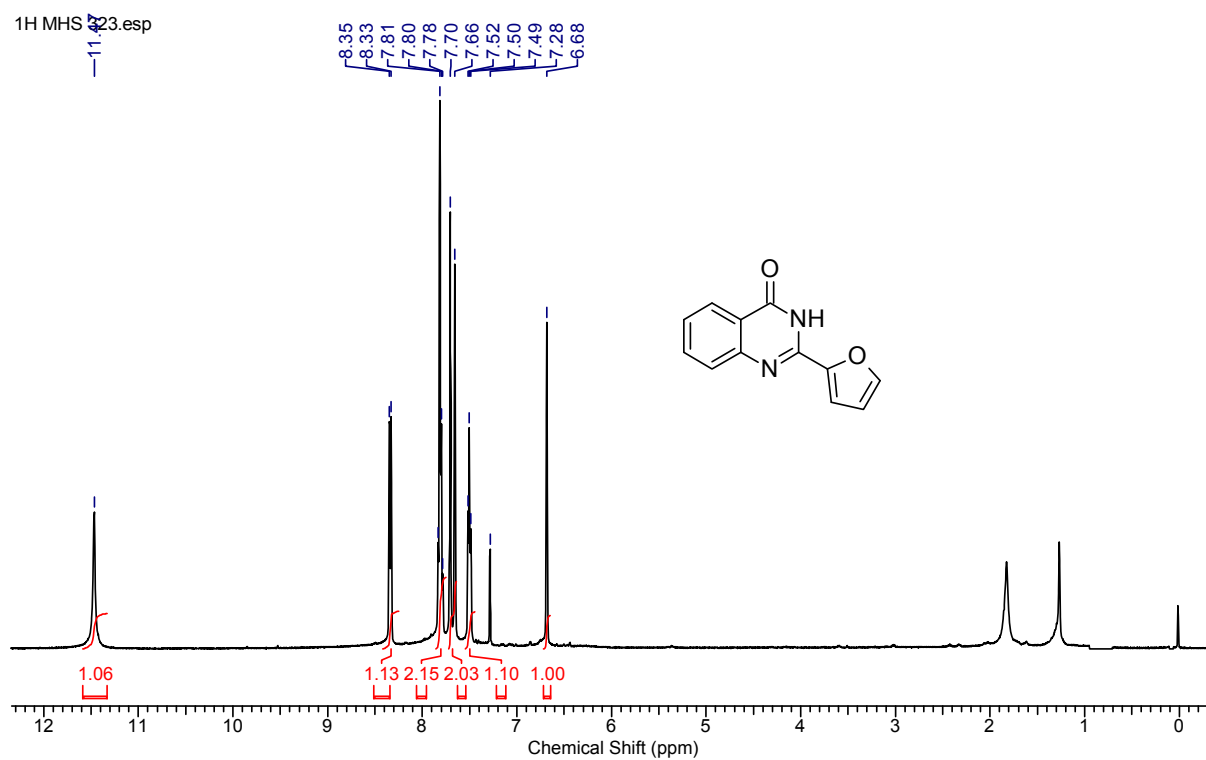

<sup>13</sup>C NMR spectrum for compound **3g** (CDCl<sub>3</sub>, 125 MHz)

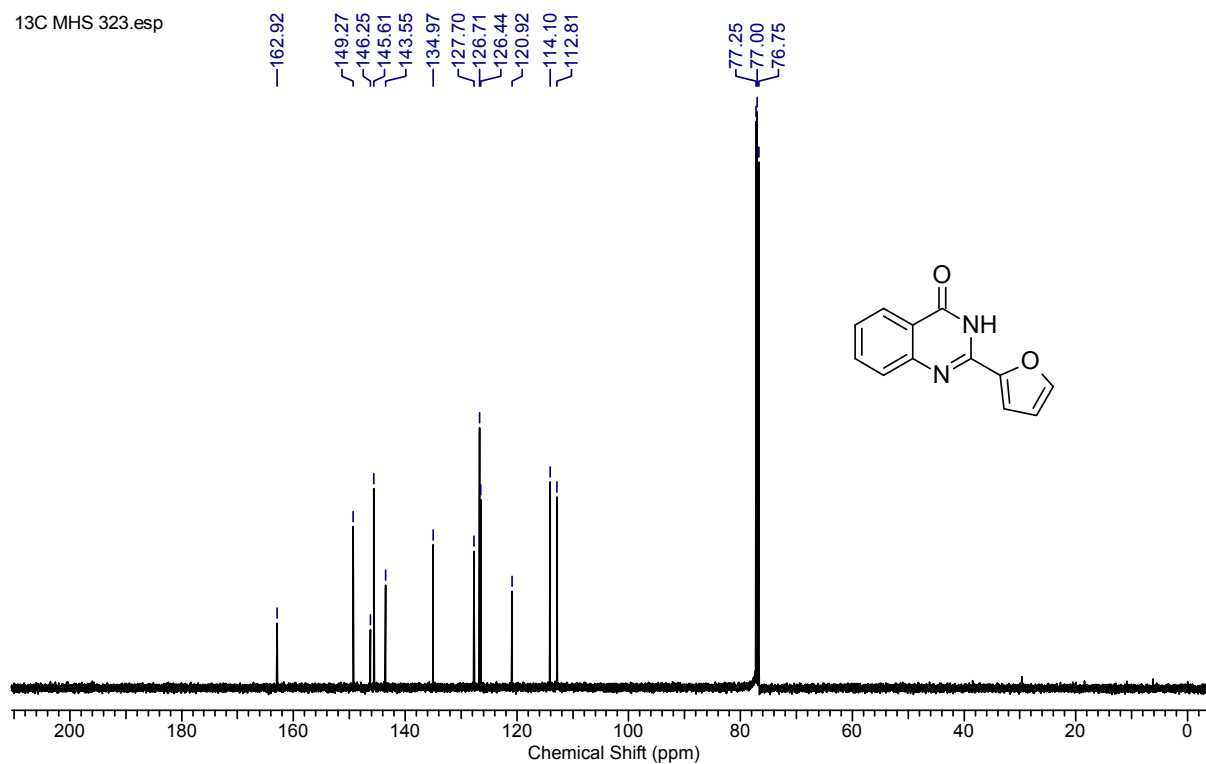

<sup>1</sup>H NMR spectrum for compound **3h** (CDCl<sub>3</sub>, 500 MHz)

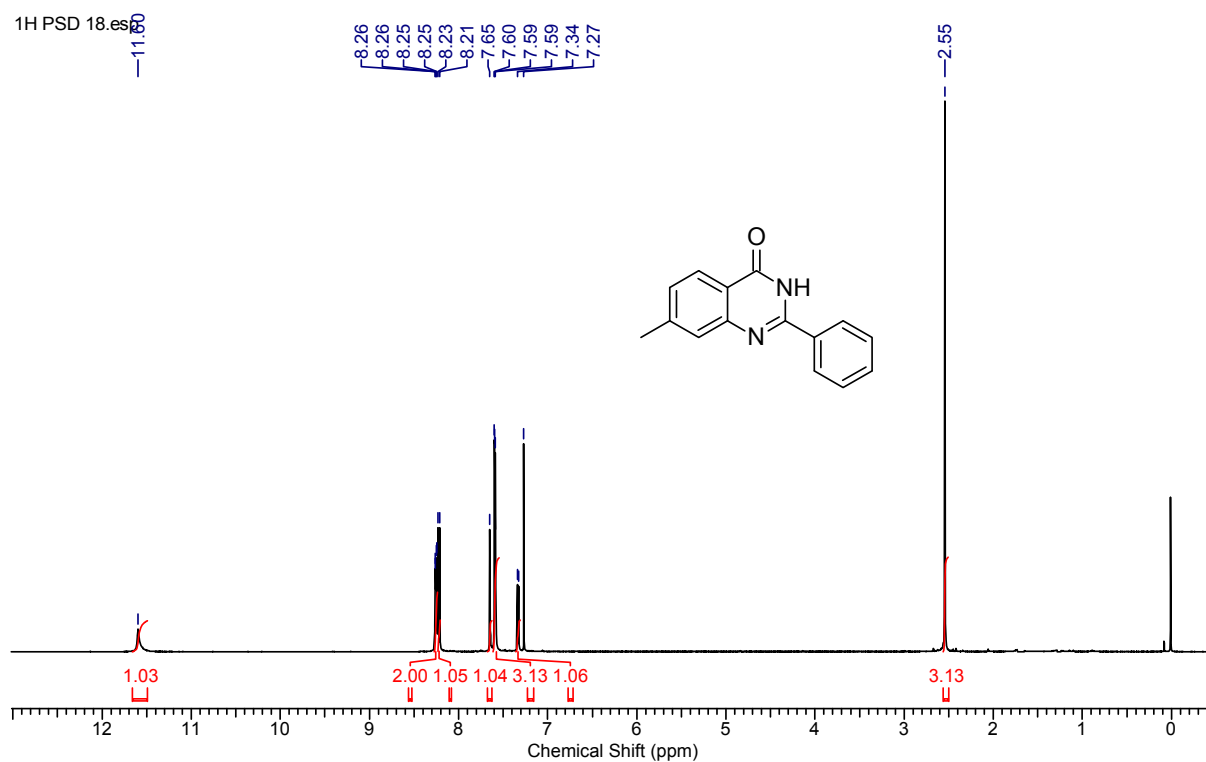

<sup>13</sup>C NMR spectrum for compound **3h** (DMSO-D<sub>6</sub>, 125 MHz)

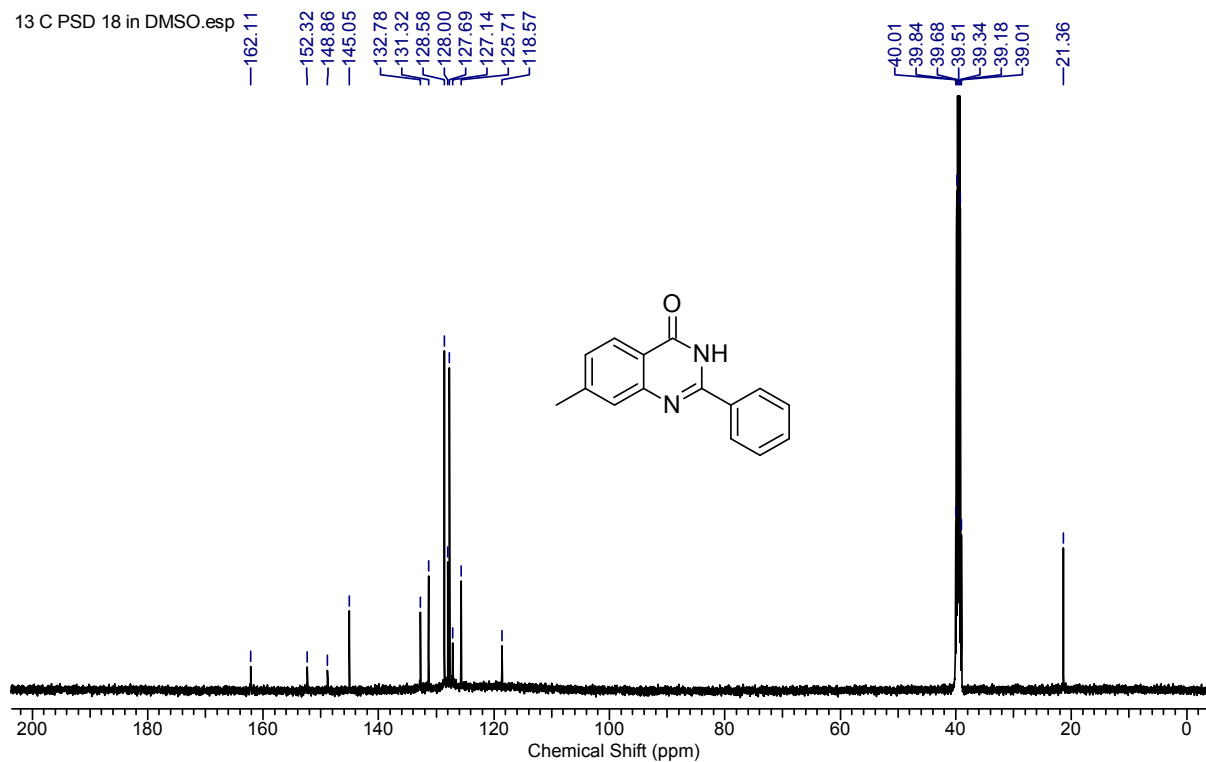

$^1\text{H}$  NMR spectrum for compound **3i** ( $\text{CDCl}_3$ , 400 MHz)

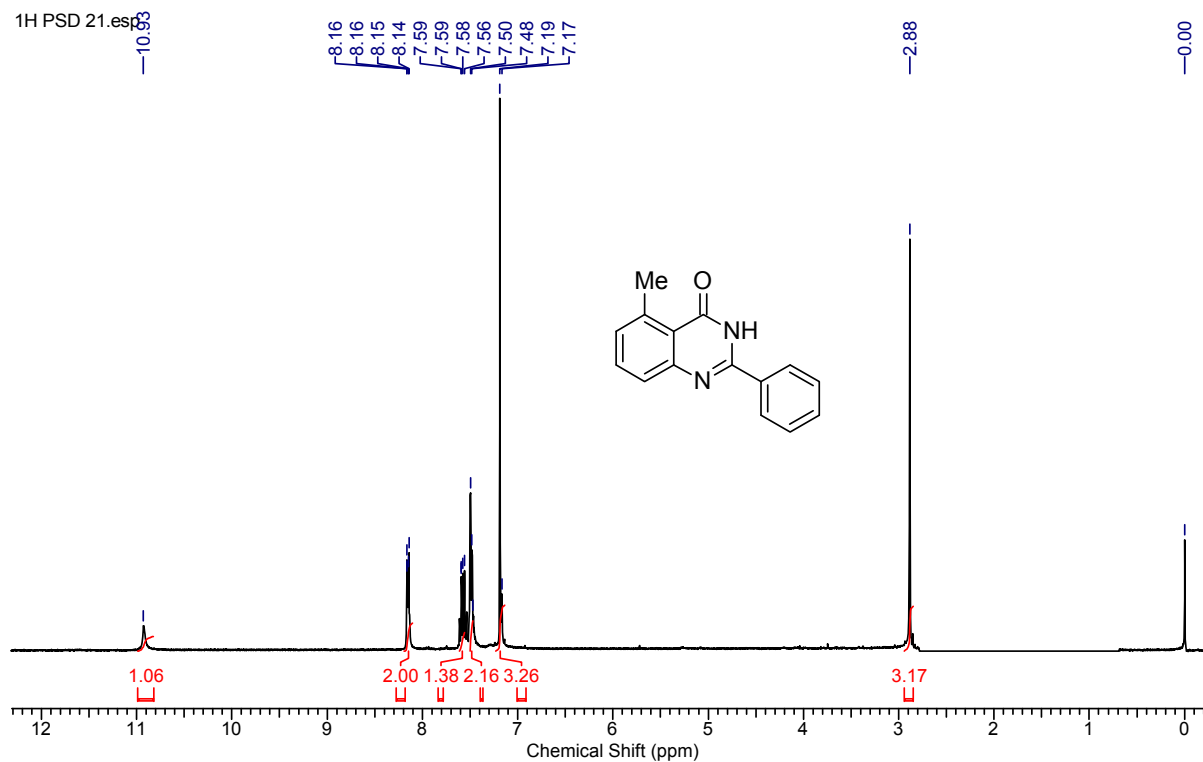

$^{13}\text{C}$  NMR spectrum for compound **3i** ( $\text{DMSO}-d_6$ , 125 MHz)

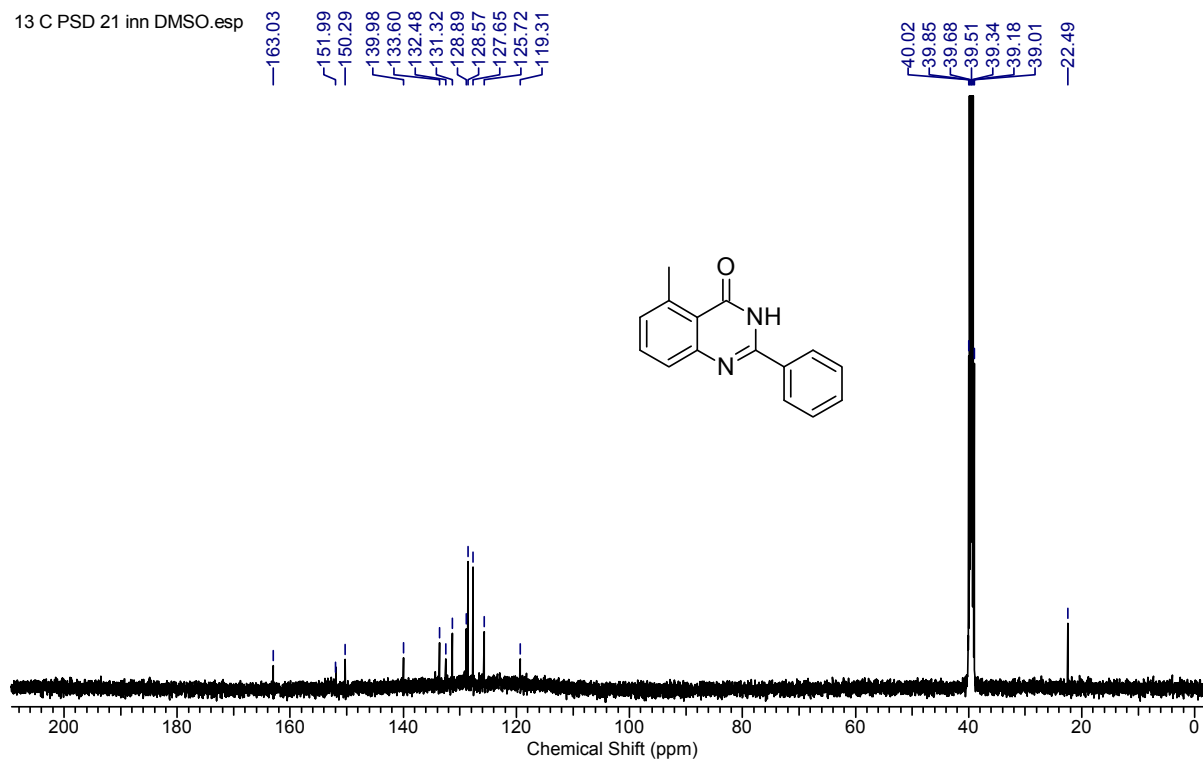

<sup>1</sup>H NMR spectrum for compound **3j** (CDCl<sub>3</sub>, 500 MHz)

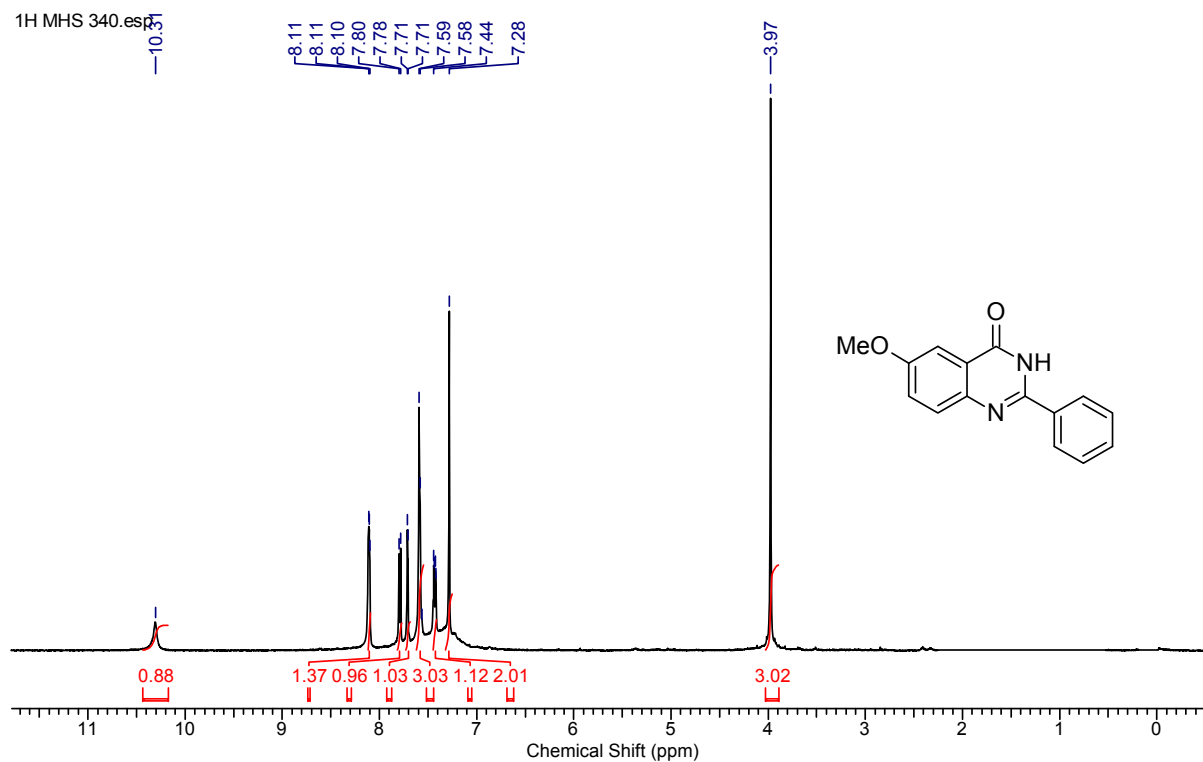

<sup>13</sup>C NMR spectrum for compound **3j** (CDCl<sub>3</sub>, 125 MHz)

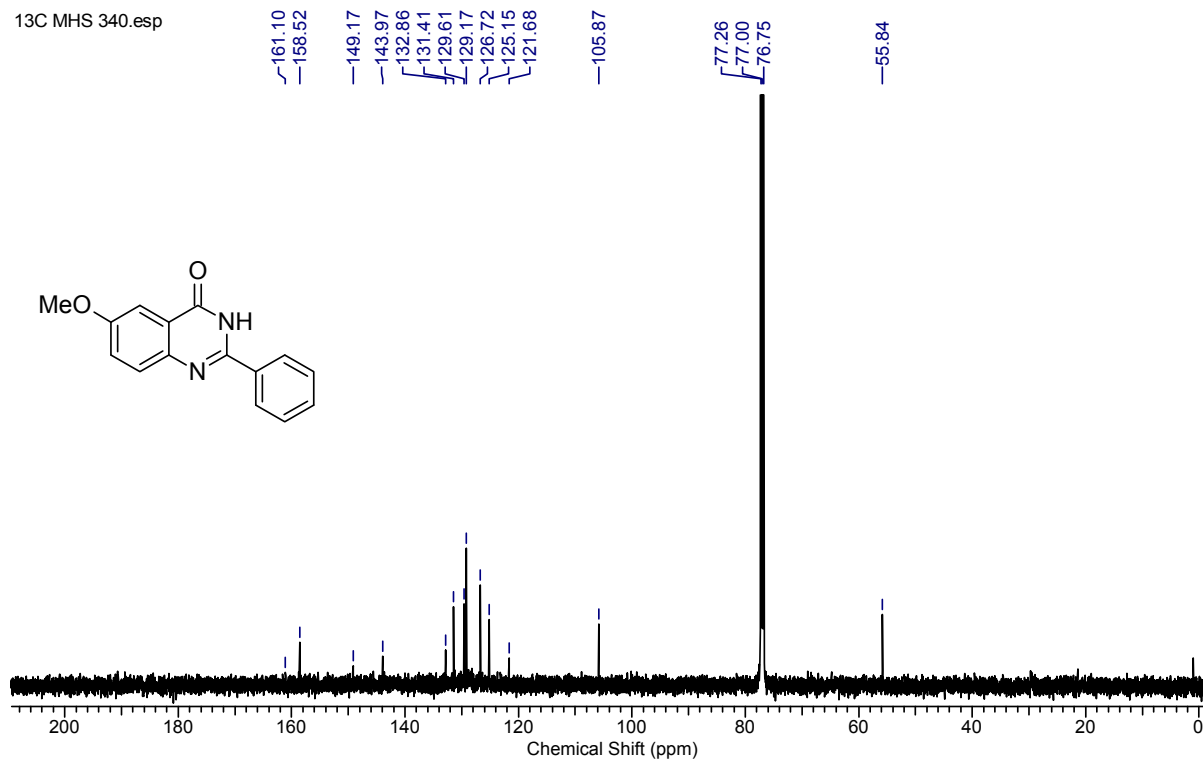



<sup>1</sup>H NMR spectrum for compound **3k** (DMSO-D<sub>6</sub>, 500 MHz)

Apr26-2016\_001.001.1r.esp

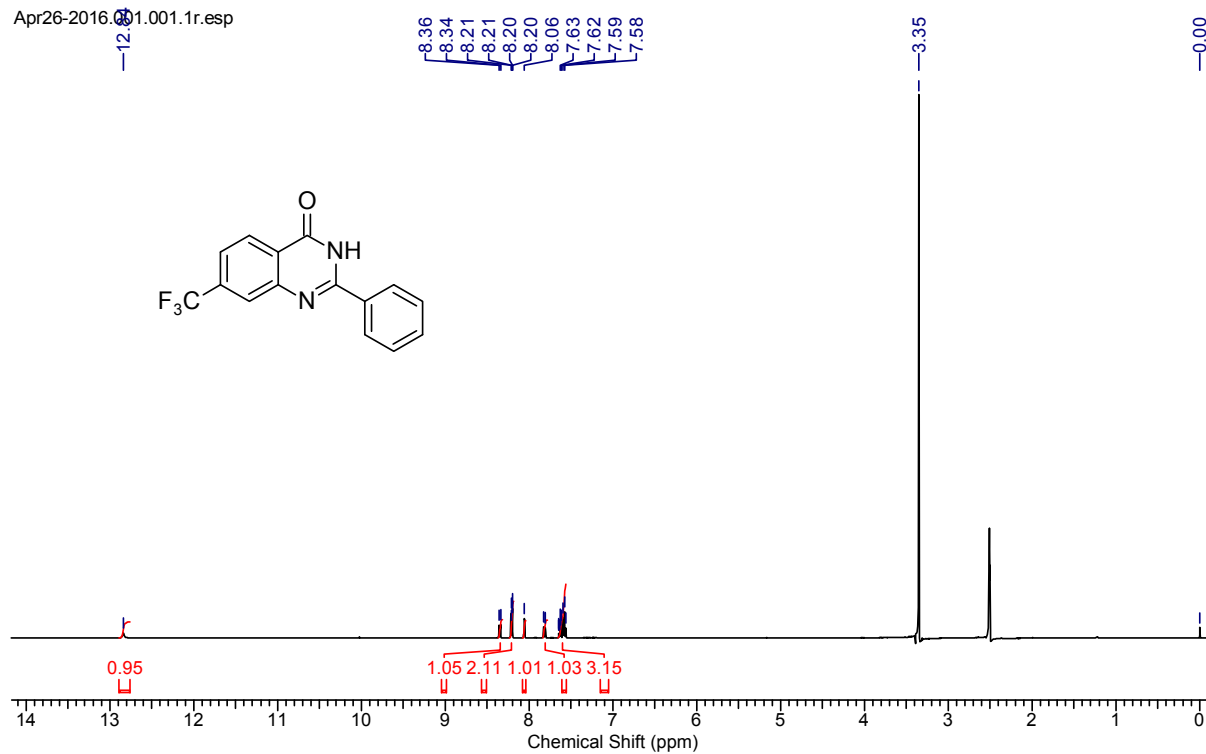

<sup>1</sup>H NMR spectrum for compound **3l** (DMSO D<sub>6</sub>, 500 MHz)

1H PSD\_002.esp

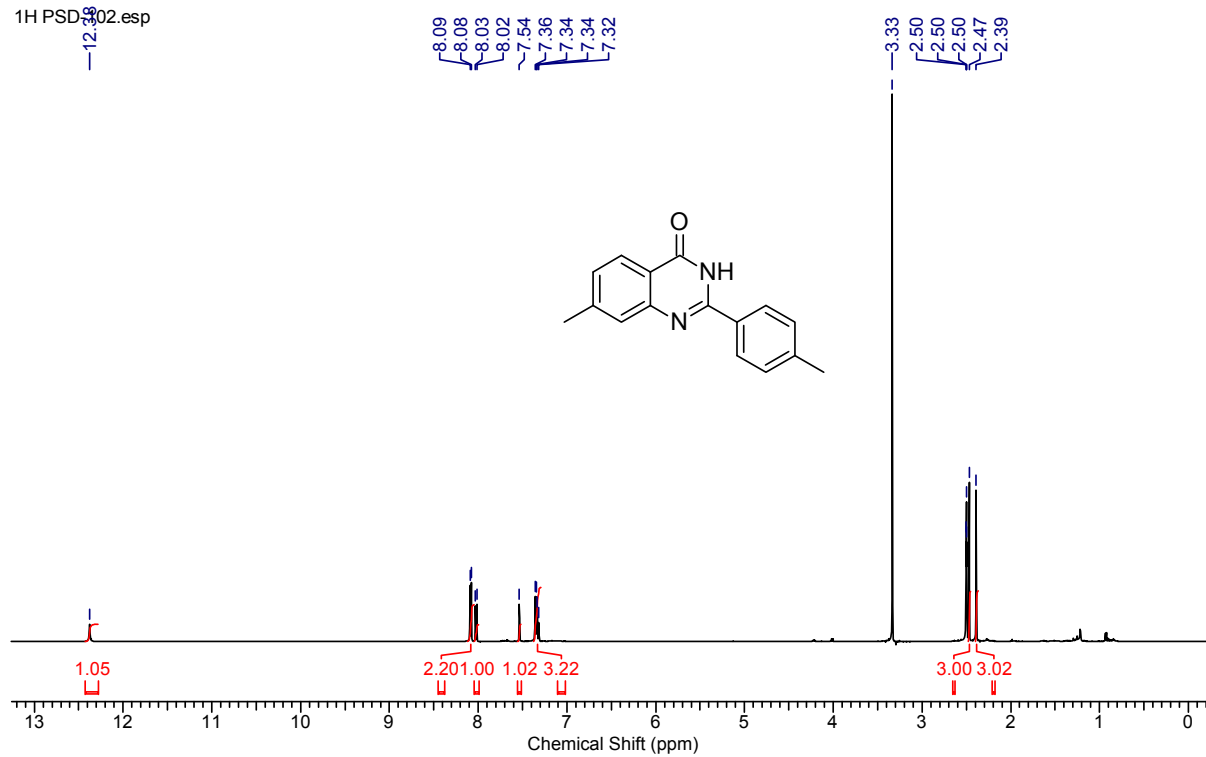

<sup>13</sup>C NMR spectrum for compound **3i** (DMSO D<sub>6</sub>, 125 MHz)

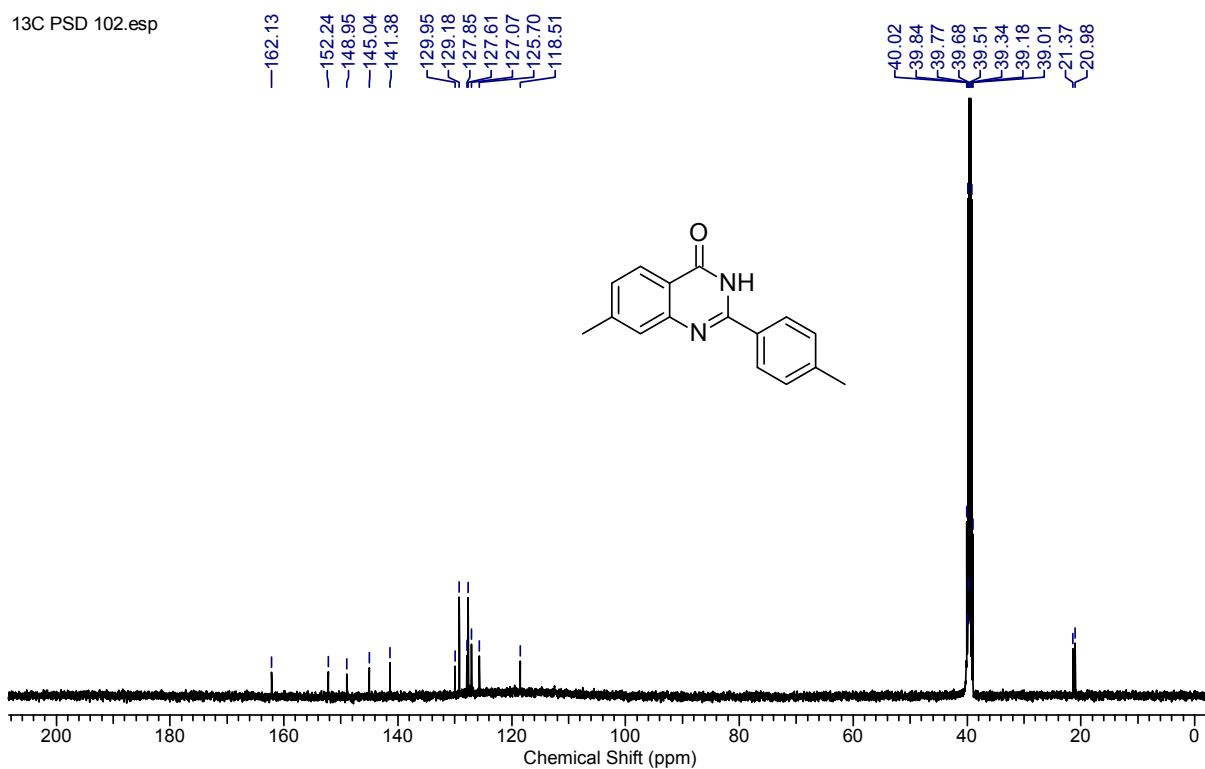

<sup>1</sup>H NMR spectrum for compound **3m** (CDCl<sub>3</sub>, 500 MHz)

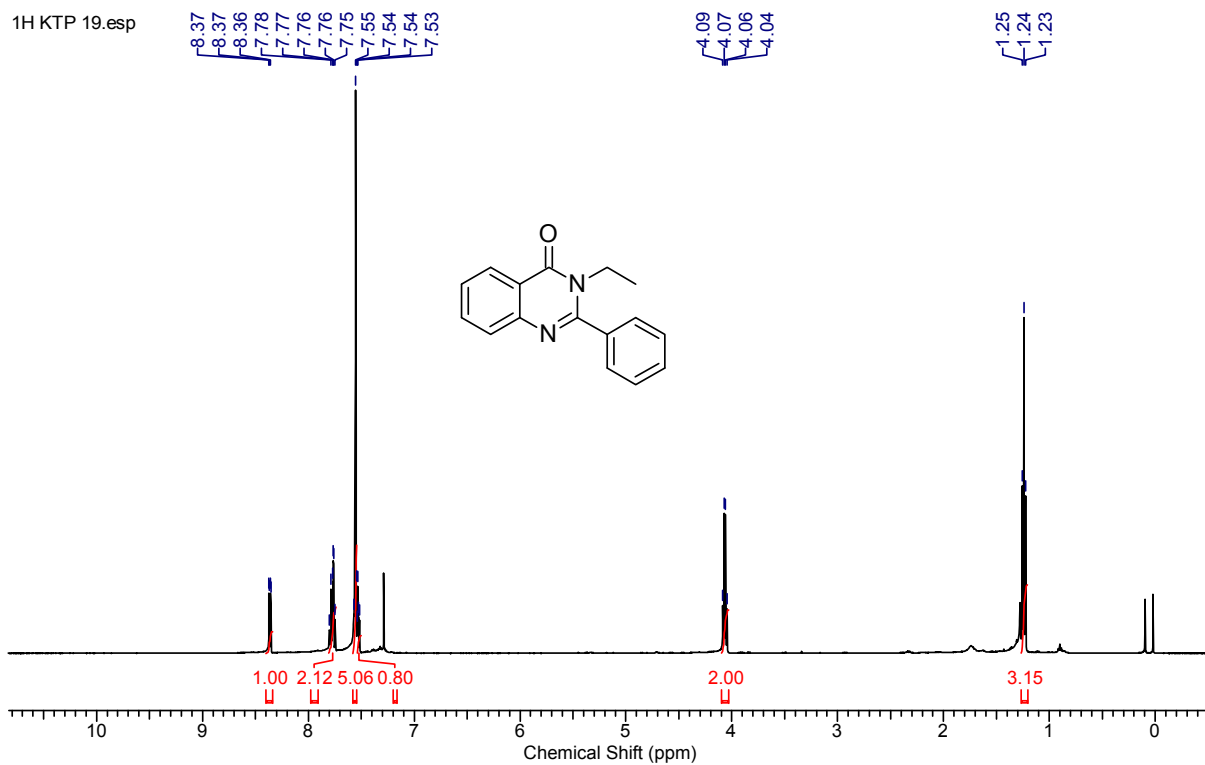

$^{13}\text{C}$  NMR spectrum for compound **3m** ( $\text{CDCl}_3$ , 125 MHz)

13C KTP 19.esp

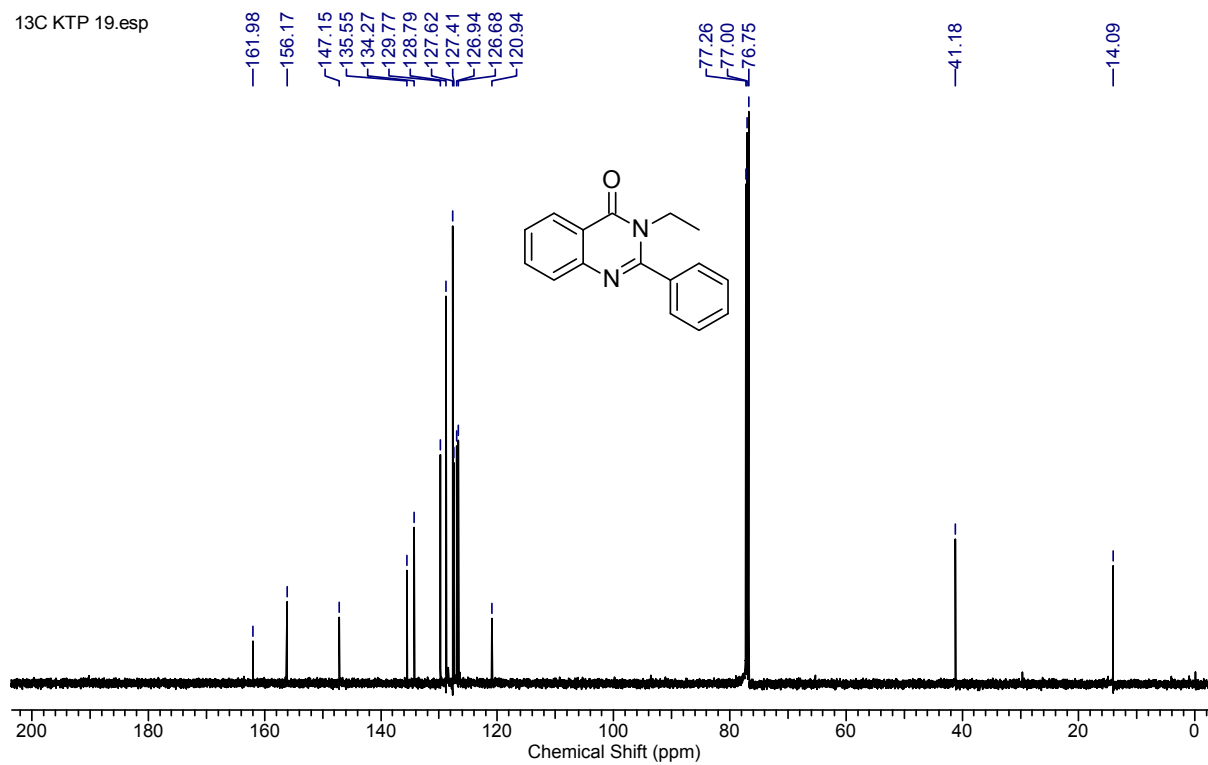

Supplement: c6ra10997g1.pdf [file c6ra10997g1.pdf]
